# Supplementary material for: Intestinal Microbiota and Metabolomics Reveal the Role of Auricularia delicate in Regulating Colitis-Associated Colorectal Cancer
Source: MDPI journal article supplement (doi:10.3390/nu15235011), 2023-12-04
Supplement: s1 [file s1]

## Supplementary material

**Table S1** Details of antibodies.

| Antibody                              | Molecular weight | Catalog number | Dilution | Company                   | Area                |
|---------------------------------------|------------------|----------------|----------|---------------------------|---------------------|
| FFAR2                                 | 50 kDa           | 19952-1-AP     | 1:1000   | Proteintech               | Wuhan, China        |
| $\beta$ -Arrestin 2                   | 50 kDa           | 10171-1-AP     | 1:1000   | Proteintech               | Wuhan, China        |
| I $\kappa$ B $\alpha$                 | 35 kDa           | ab32518        | 1:4000   | Abcam                     | Cambridge, MA, USA  |
| p-I $\kappa$ B $\alpha$ (Ser32/Ser36) | 39 kDa           | AF2002         | 1:1000   | Affinity                  | Cincinnati, OH, USA |
| TAB1                                  | 55 kDa           | 67020-1-IG     | 1:5000   | Proteintech               | Wuhan, China        |
| TAK1                                  | 67 kDa           | 12330-2-AP     | 1:1000   | Proteintech               | Wuhan, China        |
| p-TAK1 (Thr184/Thr187)                | 70 kDa           | AF4379         | 1:1000   | Affinity                  | Cincinnati, OH, USA |
| IKK $\alpha/\beta$                    | 85 kDa           | ab178870       | 1:1000   | Abcam                     | Cambridge, MA, USA  |
| p-IKK $\alpha/\beta$ (Ser180/Ser181)  | 87 kDa           | AF3013         | 1:1000   | Affinity                  | Cincinnati, OH, USA |
| NF- $\kappa$ B p65/RelA               | 60 kDa           | A18210         | 1:1000   | ABclonal                  | Wuhan, China        |
| p-NF- $\kappa$ B p65 (Ser536)         | 65 kDa           | AF2006         | 1:1000   | Affinity                  | Cincinnati, OH, USA |
| IL-1 $\beta$                          | 30 kDa           | A16288         | 1:1000   | ABclonal                  | Wuhan, China        |
| IL-6                                  | 24 kDa           | 12912S         | 1:1000   | Cell Signaling Technology | Beverly, MA, USA    |
| IL-1 $\alpha$                         | 20 kDa           | A2170          | 1:1000   |                           | Wuhan, China        |
| TNF- $\alpha$                         | 25 kDa           | A0277          | 1:1000   | ABclonal                  | Wuhan, China        |
| MCP1                                  | 26 kDa           | 66272-1-Ig     | 1:1000   | Proteintech               | Wuhan, China        |
| GAPDH                                 | 37 kDa           | E-AB-20032     | 1;2000   | Elabscience               | Wuhan, China        |
| Goat Anti-Rabbit (H+L)                | /                | E-AB-1003      | 1;4000   | Elabscience               | Wuhan, China        |
| Goat Anti-Mouse (H+L)                 | /                | E-AB-1001      | 1;4000   | Elabscience               | Wuhan, China        |

**Table S2** Relative abundance of top 20 genera.

| <b>Sample</b>                | <b>Mean of Ctrl</b> | <b>Mean of Model</b> | <b>Mean of ADL</b> | <b>Mean of ADH</b> |
|------------------------------|---------------------|----------------------|--------------------|--------------------|
| <i>Clostridium</i>           | 0.004202            | 0.01461              | 0.002916           | 0.001994           |
| <i>Turicibacter</i>          | 0.000745            | 0.006197             | 0.002047           | 0.003385           |
| <i>Phascolarctobacterium</i> | 0.013097            | 0.014018             | 0.006649           | 0.006049           |
| <i>Oscillospira</i>          | 0.018361            | 0.040055             | 0.041611           | 0.025535           |
| <i>Adlercreutzia</i>         | 0.002303            | 0.002173             | 0.001303           | 0.001486           |
| <i>Desulfovibrio</i>         | 0.008533            | 0.011349             | 0.012245           | 0.009161           |
| <i>Mucispirillum</i>         | 0.000834            | 0.001717             | 0.001831           | 0.001791           |
| <i>Bifidobacterium</i>       | 0.001513            | 0.001591             | 0.000462           | 0.001888           |
| <i>Roseburia</i>             | 0.004639            | 0.001511             | 0.000454           | 0.000057           |
| <i>[Ruminococcus]</i>        | 0.007662            | 0.007036             | 0.008931           | 0.005189           |
| <i>Lactobacillus</i>         | 0.099375            | 0.057621             | 0.031702           | 0.057311           |
| <i>Ruminococcus</i>          | 0.004628            | 0.011089             | 0.015433           | 0.016147           |
| <i>Coprococcus</i>           | 0.023208            | 0.016967             | 0.019242           | 0.012326           |
| <i>Paraprevotella</i>        | 0.001101            | 0.002141             | 0.008284           | 0.003426           |
| <i>Sutterella</i>            | 0.003923            | 0.004417             | 0.006274           | 0.006652           |
| <i>Bacteroides</i>           | 0.004252            | 0.004971             | 0.008614           | 0.010838           |
| <i>Allobaculum</i>           | 0.041358            | 0.007517             | 0.010727           | 0.015557           |
| <i>Flexispira</i>            | 0.001899            | 0.001738             | 0.00299            | 0.004929           |
| <i>Parabacteroides</i>       | 0.000769            | 0.000841             | 0.002604           | 0.002768           |
| <i>Akkermansia</i>           | 0.002036            | 0.001084             | 0.001581           | 0.002793           |

**Table S3** Significantly different metabolites.

| Adduct                    | Name                                         | Mean of Ctrl | Mean of Model | Mean of 0.45g/kg | Mean of 1.35g/kg |
|---------------------------|----------------------------------------------|--------------|---------------|------------------|------------------|
| (M-H)-                    | Orotate                                      | 19282.34     | 39213.20      | 19932.81         | 27283.77         |
| (M+H)+                    | Allantoin                                    | 19046.22     | 26409.58      | 23434.82         | 17906.86         |
| M+                        | Choline                                      | 35549.59     | 41856.17      | 29123.37         | 23283.80         |
| (M-H)-                    | (+)-12-HETE                                  | 800438.63    | 964611.34     | 899755.80        | 888147.88        |
| (M-H)-                    | cis-9-Palmitoleic acid                       | 549657.15    | 616645.32     | 545667.01        | 441609.74        |
| (M-H)-                    | Nervonic acid                                | 22326.85     | 24278.77      | 15080.39         | 16818.34         |
| (M+H)+                    | Creatinine                                   | 50917.70     | 58337.68      | 51521.48         | 38833.17         |
| (M-H)-                    | Thymidine                                    | 7895.45      | 19949.32      | 16114.46         | 15049.20         |
| (M-H)-                    | 2'-Deoxyuridine                              | 21523.55     | 42700.72      | 37930.36         | 31855.35         |
| (M-H)-                    | 2-Ethyl-2-Hydroxybutyric acid                | 30571.13     | 39644.76      | 38311.58         | 23152.79         |
| (M-H)-                    | 7Z, 10Z, 13Z, 16Z, 19Z-Docosapentaenoic acid | 261366.53    | 268411.64     | 204910.19        | 247925.21        |
| (M+H-H <sub>2</sub> O)+   | DL-Indole-3-lactic acid                      | 47974.53     | 47582.66      | 37473.85         | 27348.72         |
| (M-H)-                    | Behenic acid                                 | 10484.59     | 9857.15       | 5039.71          | 6100.14          |
| (M-H)-                    | Dihomo-gamma-Linolenic Acid                  | 184990.83    | 175296.86     | 133159.36        | 136644.00        |
| (M-H)-                    | Ethyl glucuronide                            | 3116.66      | 7241.27       | 8389.99          | 4229.35          |
| (M+H)+                    | L-Carnitine                                  | 1645264.84   | 1503513.57    | 1227646.83       | 793151.79        |
| (M+H)+                    | Pantothenate                                 | 42146.06     | 42576.09      | 42524.08         | 35201.10         |
| (M+CH <sub>3</sub> CN+H)+ | 1-Palmitoyllysophosphatidylcholine           | 62345.50     | 56843.03      | 31813.78         | 47735.45         |
| (M+Na-2H)-                | 1-Oleoyl-L-alpha-lysophosphatidic acid       | 49069.27     | 45624.58      | 29159.38         | 41434.13         |
| (M-H <sub>2</sub> O-H)-   | Glycerol 3-phosphate                         | 87002.12     | 75628.16      | 61269.38         | 59063.14         |
| (M+H)+                    | Taurine                                      | 186273.48    | 188442.61     | 211033.62        | 86242.75         |
| (M-H)-                    | 3,4-Dihydroxybenzoate (Protocatechuic acid)  | 25965.26     | 16725.51      | 10280.99         | 5804.65          |
| (M+H-H <sub>2</sub> O)+   | L-Glutamate                                  | 40602.05     | 33500.89      | 33988.40         | 22134.09         |
| M+                        | alpha-Tocopherol (Vitamin E)                 | 173847.09    | 161320.69     | 144436.26        | 173276.27        |
| (M+K)+                    | Ile-Asn                                      | 21848.69     | 14682.02      | 12172.01         | 14646.87         |
| (M+H)+                    | Anthranilic acid (Vitamin L1)                | 109909.56    | 91434.55      | 133647.14        | 72262.15         |
| (M+H)+                    | 1-Palmitoyl-sn-glycero-3-phosphocholine      | 52426.69     | 35313.38      | 69672.19         | 19681.84         |
| (M+H-H <sub>2</sub> O)+   | 1-Aminocyclopropanecarboxylic acid           | 16108.77     | 18325.88      | 27232.87         | 24930.57         |
| (M-H)-                    | 3-Indolepropionic acid                       | 19264.12     | 6850.39       | 7837.07          | 8644.35          |

|                             |                      |          |          |          |          |
|-----------------------------|----------------------|----------|----------|----------|----------|
| (M+H-H <sub>2</sub> O)+     | Dopamine             | 11857.67 | 5984.61  | 7642.94  | 5839.46  |
| (M-H)-                      | Phenol               | 26535.33 | 17734.05 | 22560.08 | 16790.92 |
| (M+CH <sub>3</sub> COO+2H)+ | Cyclohexylamine      | 16149.28 | 7295.55  | 9055.07  | 10006.53 |
| (M+H)+                      | L-Palmitoylcarnitine | 23467.00 | 20233.18 | 27983.09 | 22442.88 |
| (M+H)+                      | Nicotinamide N-oxide | 11999.32 | 7114.54  | 11521.63 | 15643.40 |
| M+                          | 1-Methylnicotinamide | 27252.88 | 17201.35 | 24155.77 | 23874.91 |
| (M-H)-                      | Cyclopiazonic Acid   | 8828.82  | 4707.96  | 9773.92  | 10128.77 |

## Figure List

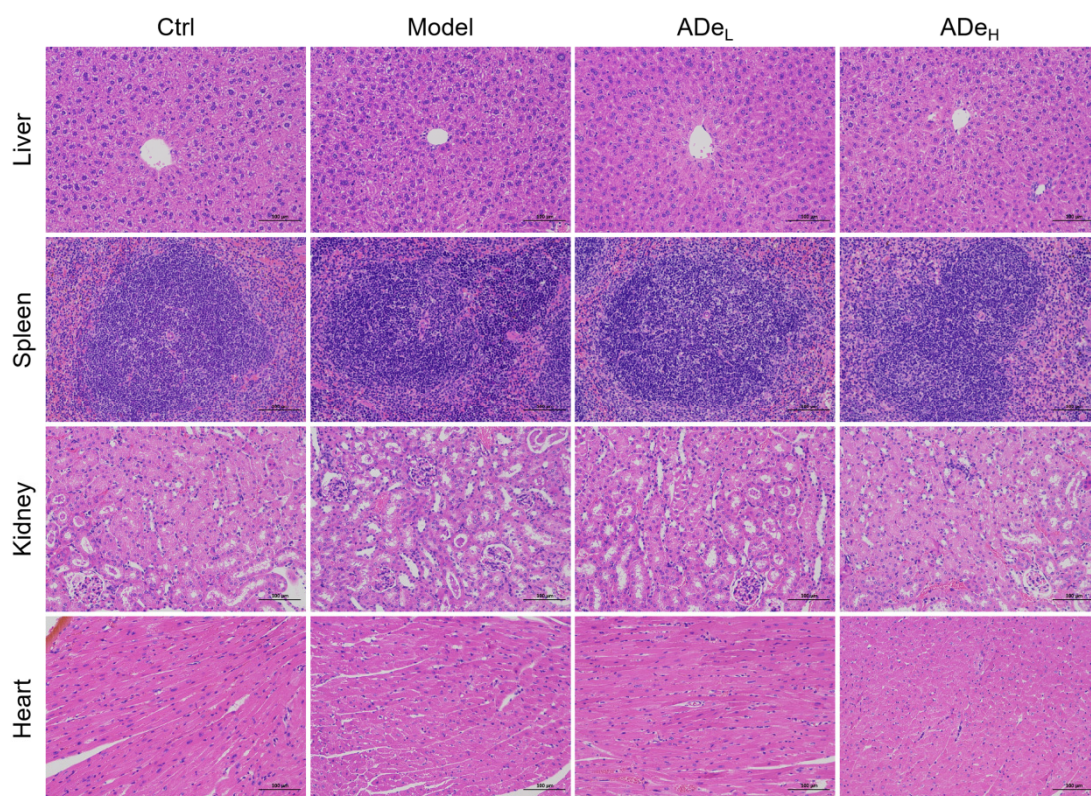

**Figure S1** Histopathological analysis of the liver, spleen, kidney, and heart via H&E staining (200×; scale bar: 100 μm).

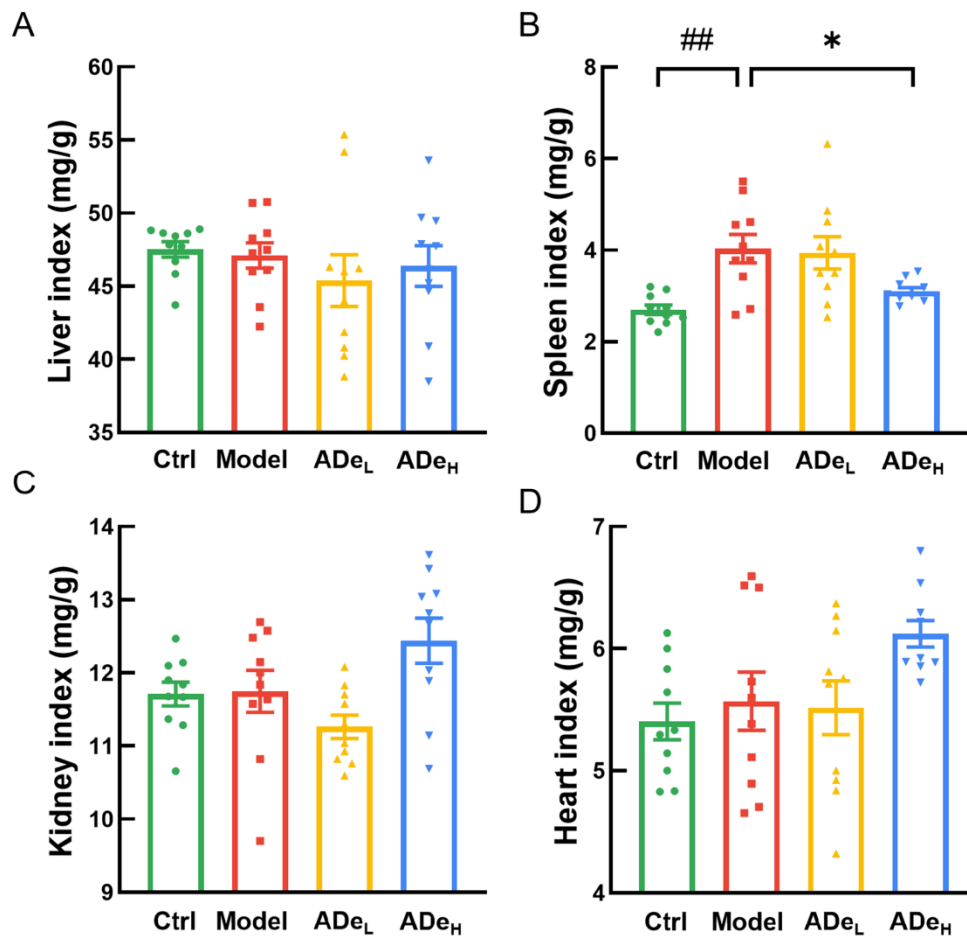

**Figure S2** The effect of ADe on organ indices in CAC mice. the (A) liver, (B) spleen, (C) kidney, and (D) heart. Data are presented as the means ± S.E.M. Different groups performed with one-way ANOVA followed by a post hoc multiple comparisons (Dunnett) test.  $^{##}p < 0.01$  vs. Ctrl group;  $^{*}p < 0.05$  vs. model group.
